# Supplementary material
Source: PubMed Central journal article supplement (PMC3023473)
Supplement: supp_M110.169367_jbc.M110.169367-1.pdf [file supp_M110.169367_jbc.M110.169367-1.pdf]

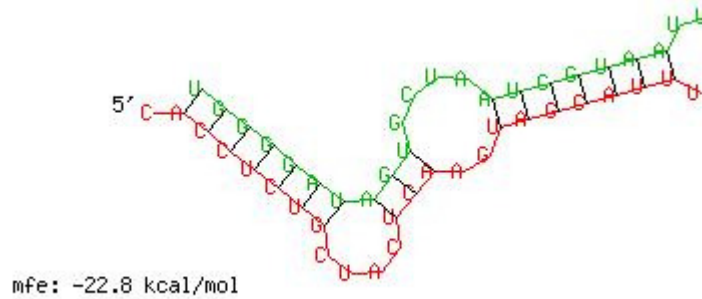

## Site 1

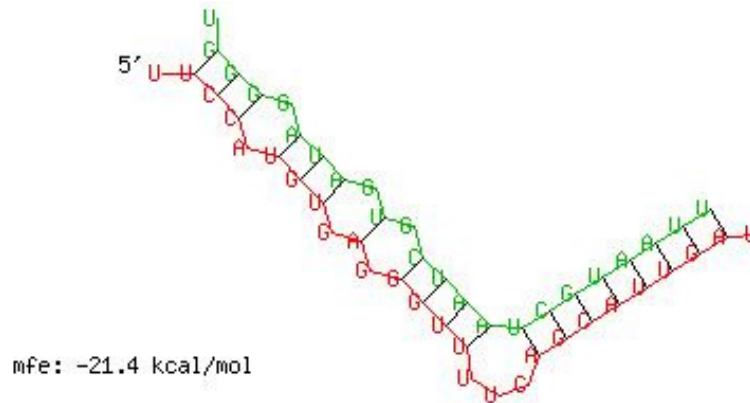

## Site 2

**Supplement Figure S1. Predicted structure for miR-155 pairing to each site in the 3'UTR of IL13R $\alpha$ 1.** Also shown is the correspondent predicted minimum free energy hybridisation. Site 1 shows miR-155 hybridization to positions 1049-1071 in the 3'UTR of IL13R $\alpha$ 1; Site 2 shows miR-155 hybridization to positions 1399 and 1424 in the 3'UTR of IL13R $\alpha$ 1.

|                            |                                                                 |
|----------------------------|-----------------------------------------------------------------|
| <i>H. sapiens</i>          | TTT----CTTCACCTCTGCTACTCAAG <b>T--AGCATT</b> TACTGTGTCTTTGGTTT  |
| <i>P. troglodytes</i>      | TTT----CTTCACCTCTGCTACTCAAG <b>T--AGCATT</b> TACTGTGTCTTTGGTTT  |
| <i>P. pygmaeus</i>         | TTT----CTTCACCTCTGCTACCCAAG <b>T--GGCATT</b> TACTGTGTCTTTGGTTT  |
| <i>M. mulatta</i>          | TTT----CTTCACCTCTGCTACTCAAG <b>T--AGCATT</b> TACTGTGTCTTTGGCTT  |
| <i>C. jacchus</i>          | TGT----CTTCACCTCTGCTACTCAAT <b>T--AGTATT</b> TACTGTGTCTTTGGCTT  |
| <i>M. musculus</i>         | GCCACCTTTTCATTTCTGCTATTCAA----- <b>GTTTT</b> GACTATGTATCTAGCTT  |
| <i>R. norvegicus</i>       | GCTTACCTTTTCATTTCTGCTACTCAAG <b>TCAAGTATAG</b> ACTATGTATCTAGCTT |
| <i>B. taurus</i>           | CTT----CTTCACCACTGCTATTTCAGA <b>TCAAGTATT</b> TAGCACACGTCGGATT  |
| <i>C. lupus familiaris</i> | CTT----CTTAATCTCTGCCGATCA----- <b>GATATT</b> CACCAGGTGT---GCCT  |
| <i>E. caballus</i>         | TGT----CTTCACCTCTGCTACTCAGA <b>TCAAGTACT</b> CACTATGTGTCTAGATT  |

**Supplement Figure S2. Conservation of miR-155 targeting “Site1” in the 3'UTR's of different species.**

|                       |                                                                          |
|-----------------------|--------------------------------------------------------------------------|
| <i>H. sapiens</i>     | TTCCATGTGAG-----GGTTTTTC <u>AGCA-TTGA</u> -TATT----T-----GTGC            |
| <i>P. troglodytes</i> | TTCCATGTGAG-----GGTTTTTC <u>ATCA-TTGA</u> -TATT----T-----GTGC            |
| <i>P. pygmaeus</i>    | TTCCATGTGAG-----GGTTTTTC <u>AGCA-TTGA</u> -TATT----T-----GTGC            |
| <i>M. mulatta</i>     | TTCCATGTGAG-----GGTTTTTC <u>AGCA-TTGA</u> -TATT----T-----GTGC            |
| <i>C. jacchus</i>     | TTCTGTGTGAG-----GGTTTTTC <u>AGCA-TTGA</u> -TATT----T--ATCTATGC           |
| <i>M. musculus</i>    | TTACCTGTGAGCCTGCAATTATTTGAGGTTTTTC <u>AGCAATTGG</u> -TGTT----TCT----ATGT |
| <i>R. norvegicus</i>  | TTCCCTGTGAGCCTGCAA---TTTGAGATTTTCA <u>AGCAATTGG</u> -TGTT----TCT----GTGT |
| <i>B. taurus</i>      | TTCTATGTGAGTCTGCATTTATTTGAAGGTTTTTC <u>AGCA-TTTA</u> CTGTT----T-----ATGC |
| <i>C. lupus f.</i>    | TTCTGCGTGAGTCTGCATTTCTTTGAAGGTTTTTC <u>AGCA-TTTA</u> CTAAT----T-----ATGC |
| <i>E. caballus</i>    | TGTTGTGTGAGTCTGCATTTCTTTGAAGGTTTTTC <u>AGCA-TTTA</u> CTTTTTCTCT-----ACGC |

**Supplement Figure S3. Conservation of miR-155 targeting “Site2” in the 3’UTR’s of different species.**

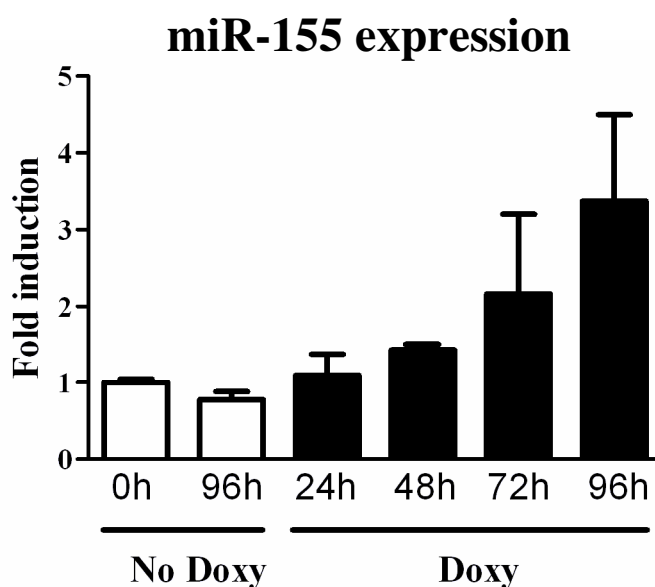

**Supplement Figure S4. MiR-155 fold increase upon addition of Doxycycline to THP1-155 cells.**  
Control experiment for Fig 2 and Fig 3.

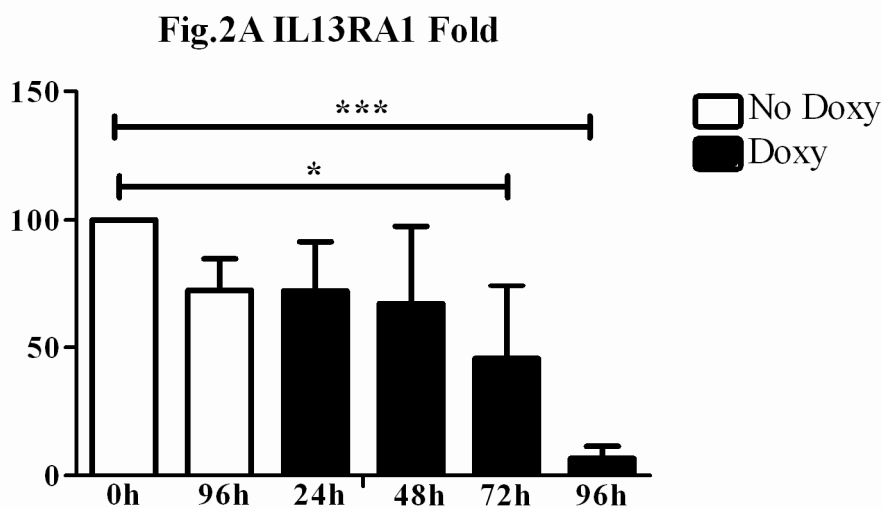

**Supplement Figure S5. IL13RA1 protein levels in THP1-155 cells after doxycycline treatment.** Statistical analysis of three independent western blot experiments that match results shown in Fig 2A. \* $p \leq 0.05$ ; \*\*\*  $p \leq 0.001$

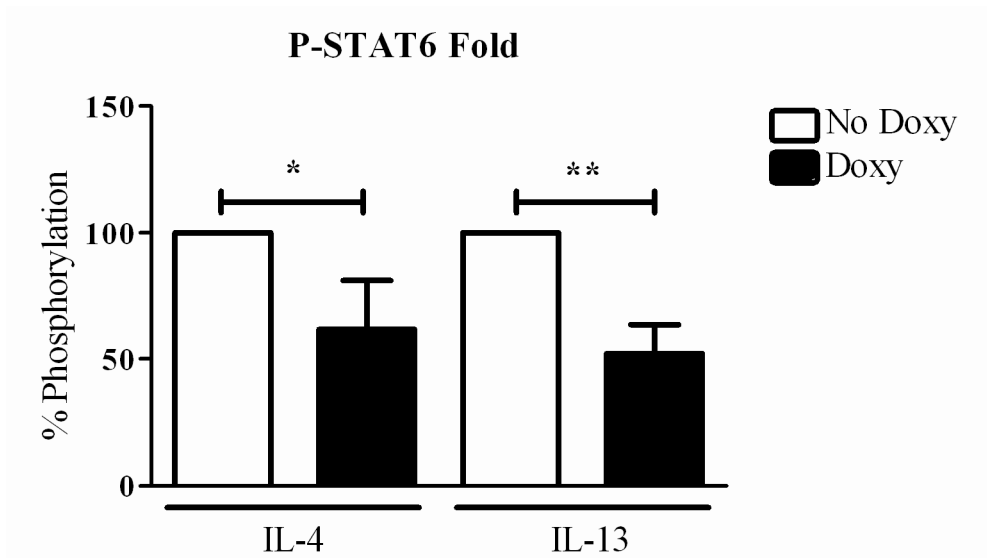

**Supplement Figure S6. P-STAT6 levels in THP1-155 cells after doxycycline treatment and IL4 or IL13 stimulation.** Statistical analysis of three independent western blot experiments that match results shown in Fig 3A. \* $p \leq 0.05$ ; \*\*  $p \leq 0.01$

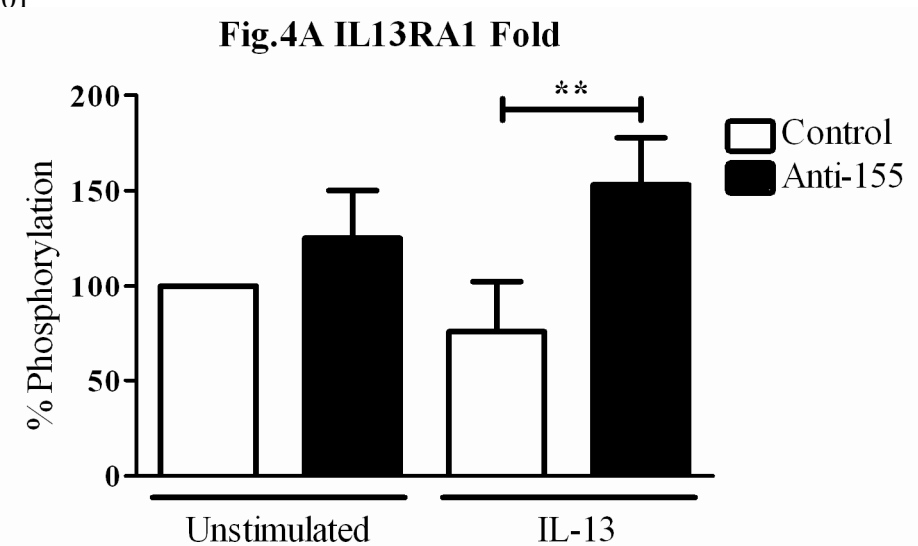

**Supplement Figure S7. IL13RA1 protein levels in macrophages after anti-miR-155 transfection.** Statistical analysis of three independent western blot experiments that match results shown in Fig 4A. \*\*  $p \leq 0.01$

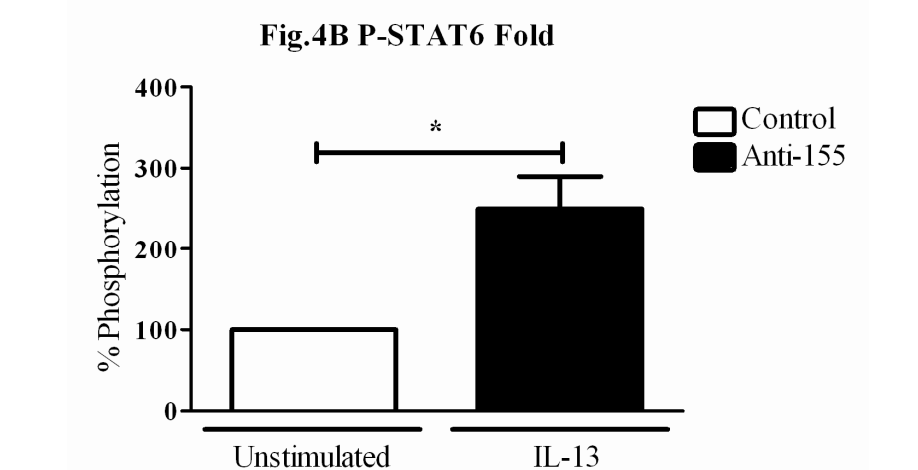

**Supplement Figure S8. P-STAT6 levels in macrophages after anti-miR-155 transfection.** Statistical analysis of three independent western blot experiments that match results shown in Fig 4B. \* $p \leq 0.05$

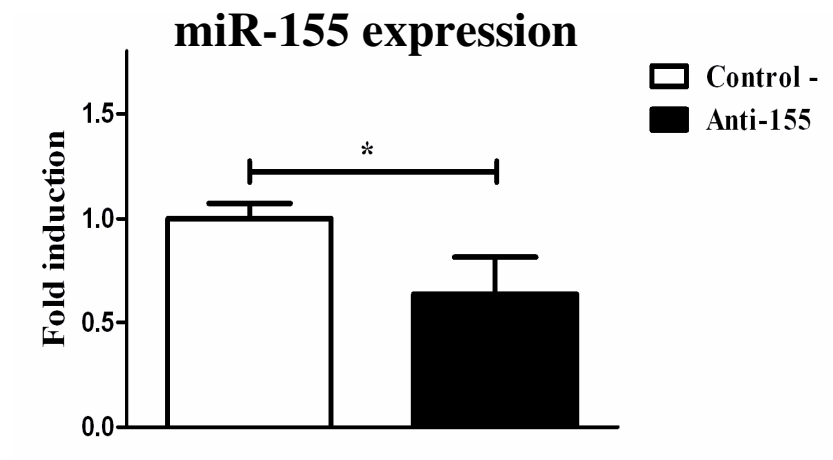

**Supplement Figure S9. MiR-155 knock down efficiency in human macrophages at day 3 before IL-13 treatment.** Control experiment for Figs. 4 and 5.
